# Supplementary material for: Dermoscopy and Reflectance Confocal Microscopy for Monitoring the Treatment of Actinic Keratosis with Ingenol Mebutate Gel: Report of Two Cases
Source: PubMed Central journal article supplement — Dermatol Ther (Heidelb). 2016 Feb 4;6(1):81–7. doi: 10.1007/s13555-016-0094-9 (PMC4799035; doi:10.1007/s13555-016-0094-9), 2016-02-04
Supplement: 13555_2016_94_MOESM1_ESM.pdf [file 13555_2016_94_MOESM1_ESM.pdf]

- Evidence for the use of dermoscopy and Reflectance Confocal Microscopy (RCM) for monitoring of ingenol mebutate therapy is scarce.
- Dermoscopy and RCM are useful for the assessment and monitoring of therapy outcomes in patients with actinic keratosis.
- Ingenol mebutate, inducing lesion necrosis and neutrophil-mediated antibody-dependent cellular cytotoxicity, is a valuable treatment for actinic keratosis.
- Given the rapid mechanism of action, treatment with ingenol mebutate is necessary for only 2 or 3 days.

This summary slide represents the opinions of the authors. Medical writing assistance for this study was provided by Dr. Carmen Innes (Springer Healthcare Communications). For a full list of acknowledgments and disclosures for all authors of this article, please see the full text online. © The Author(s) 2016. Creative Commons Attribution Noncommercial License (CC BY-NC).
